# Supplementary material for: Nanowire network-based photodetectors with imaging performance for omnidirectional photodetecting through a wire-shaped structure
Source: Royal Society of Chemistry journal article supplement (doi:10.1039/c8ra06555a), 2018-01-01
Supplement: c8ra06555a1.pdf [file c8ra06555a1.pdf]

Electronic Supplementary Information

# **Nanowire Network-based Photodetectors with Imaging Performance for Omnidirectional Photodetecting through Wire-shaped Structure**

Shalong Wang, Yousheng Zou\*, Qingsong Shan, Jie Xue, Yuhui Dong, Yu Gu, Jizhong Song\*

MIIT Key Laboratory of Advanced Display Materials and Devices, Institute of Optoelectronics & Nanomaterials, School of Materials Science and Engineering, Nanjing University of Science and Technology, 200 Xiaolingwei, Nanjing 210094, China

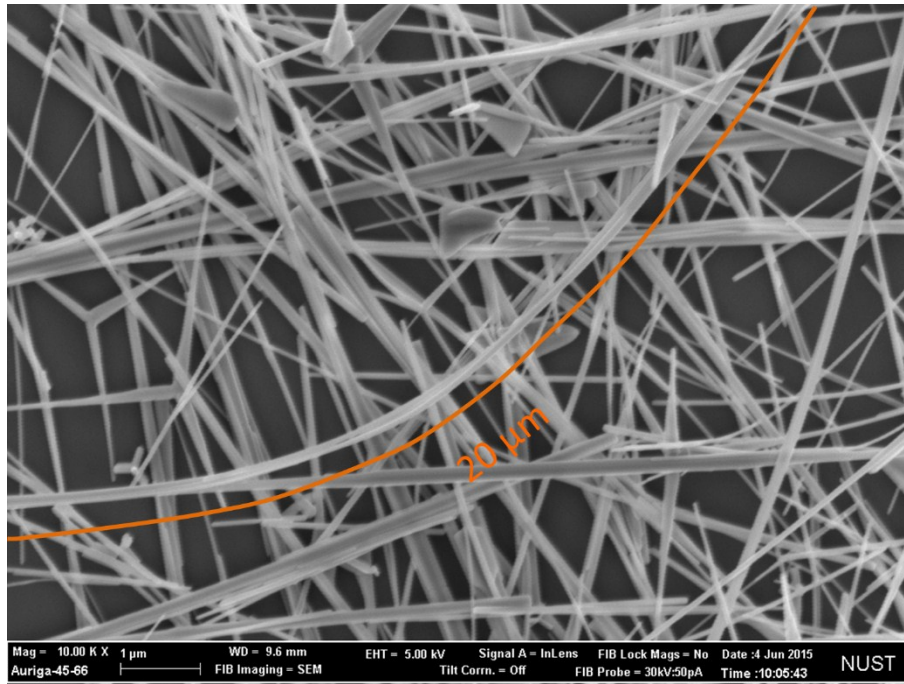

**Figure S1.** SEM image of ZnO NWs.

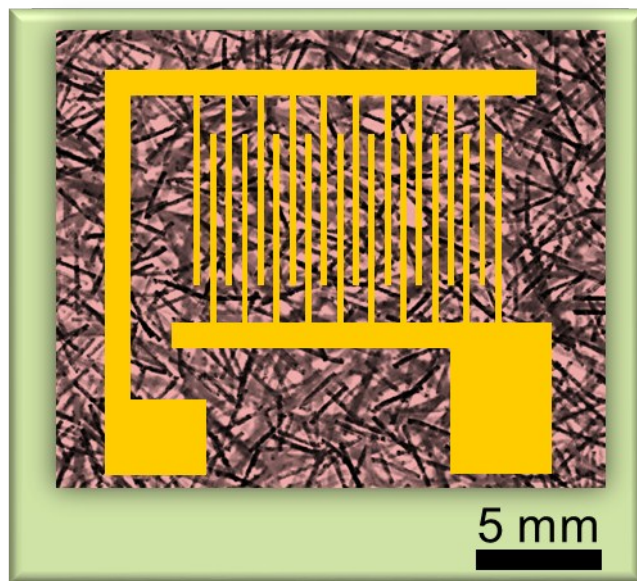

**Figure S2.** Device structure of ZnO NW network PDs.

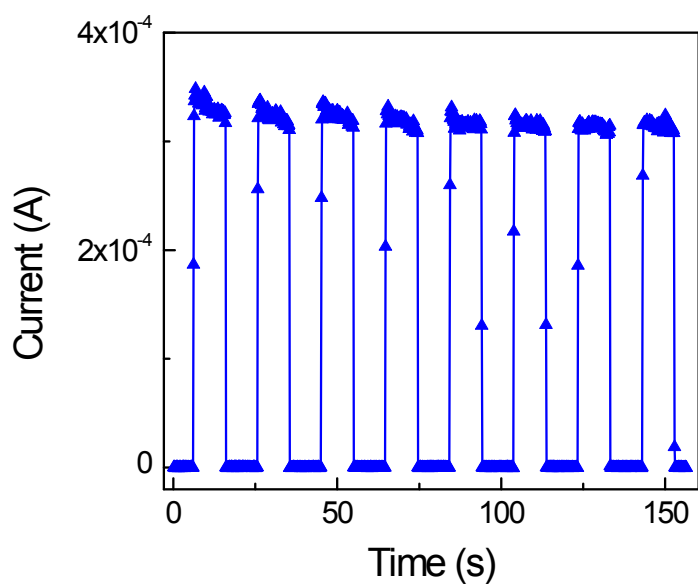

**Figure S3.** *I-t* curve of ZnO NW network-based PDs.

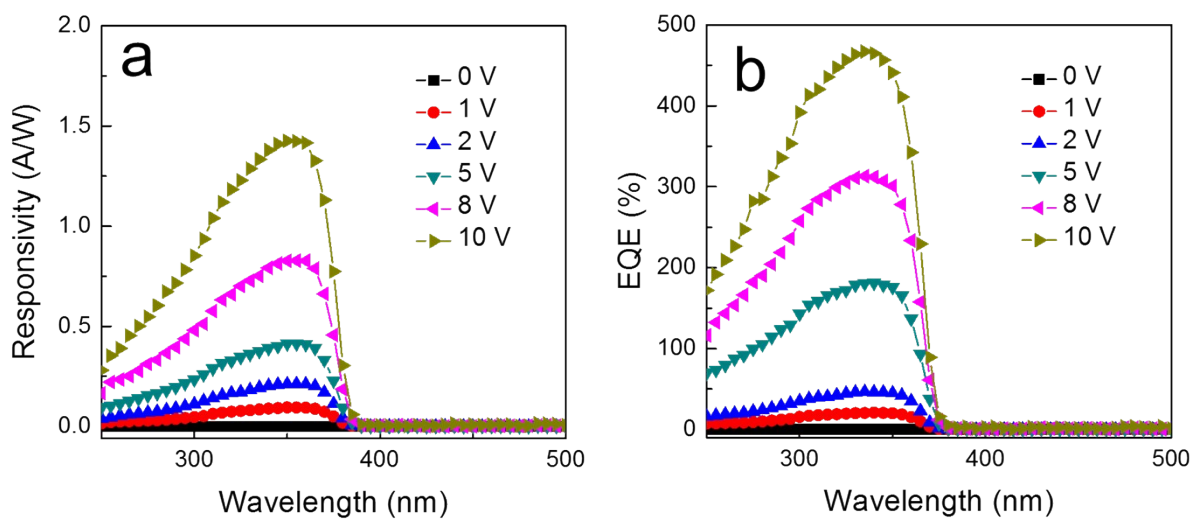

**Figure S4.** (a) The relationship between responsivity and wavelength at different bias voltages of ZnO NW PD. (b) The relationship between EQE and wavelength at different bias voltages of ZnO NW PD.

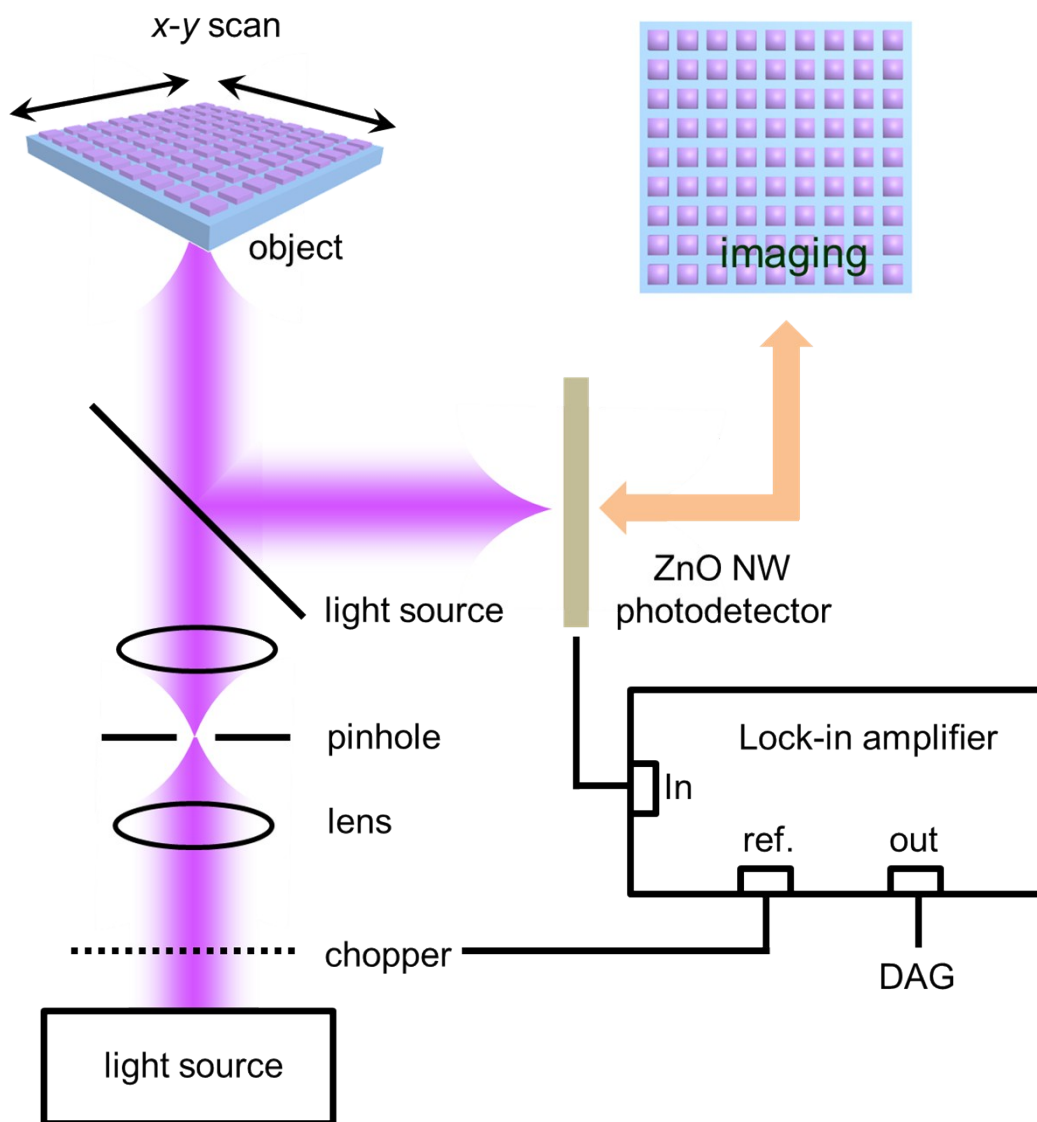

**Figure S5.** Schematic of the PD imaging setup

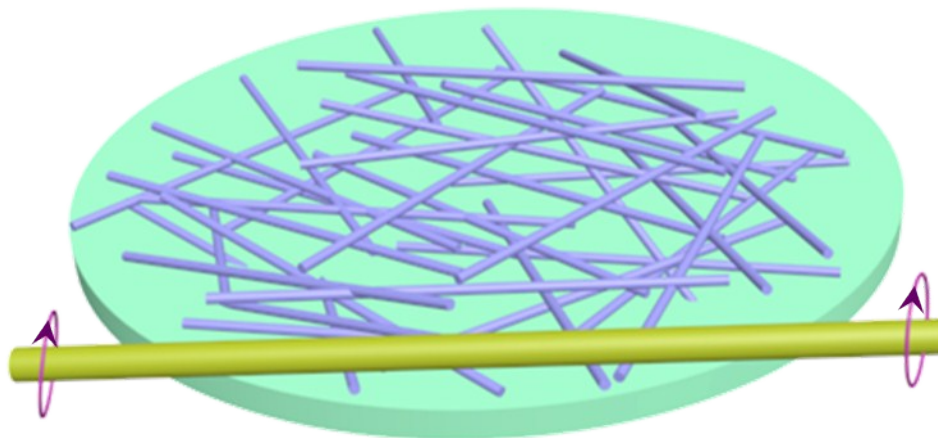

**Figure S6.** Schematic illustration of the transfer process of ZnO NWs from PVDF filter membrane to KEVLAR wire.

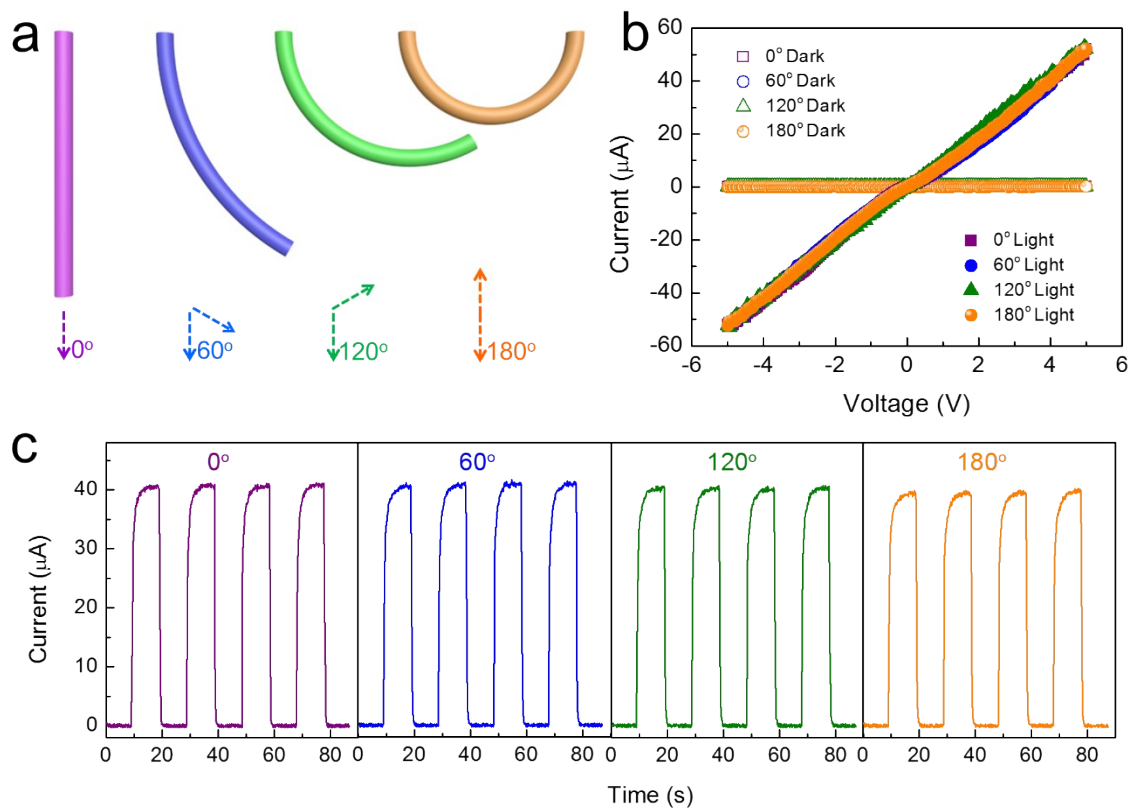

**Figure S7.** (a) Illustration of different bending angles of the wire-shaped ZnO PDs (b) characteristics of wire-shaped ZnO NW PD under different bending angles in dark and under 365 nm ( $0.35 \text{ mW}\cdot\text{cm}^{-2}$ ) illumination. (c)  $I-t$  curves (365 nm,  $1 \text{ mW}\cdot\text{cm}^{-2}$ ) of wire-shaped ZnO NW PD under different bending angles.

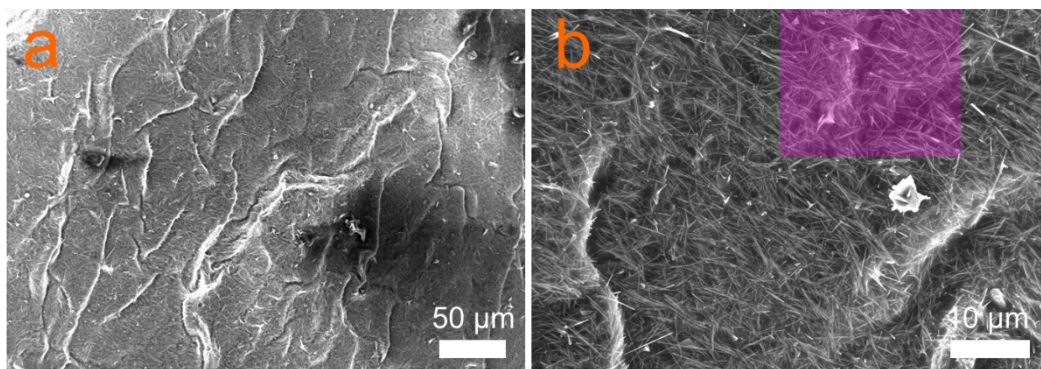

**Figure S8.** SEM images of wire-shaped ZnO NW PD after 500 times bending.



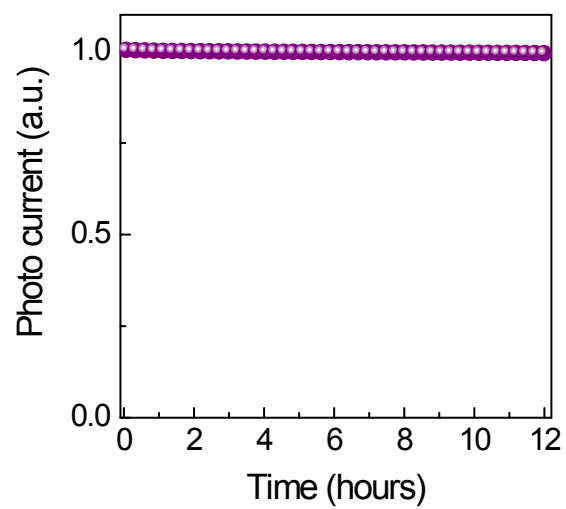

**Figure S9.** Stability of  $I_{\text{light}}$  after more than 12 hours irradiation under the power intensity of  $0.1 \text{ mW} \cdot \text{cm}^{-2}$ .
